## SHORTOMICS

# Proteomic analyses of iron-responsive, Clp-dependent changes in *Staphylococcus aureus*

Allison J. Farrand<sup>1</sup>, David B. Friedman<sup>2</sup>, Michelle L. Reniere<sup>3</sup>, Hanne Ingmer<sup>4</sup>, Dorte Frees<sup>4</sup> and Eric P. Skaar<sup>1,\*</sup>

<sup>1</sup>Department of Pathology, Microbiology and Immunology, Vanderbilt University School of Medicine, Nashville, TN 37232, USA, <sup>2</sup>Department of Biochemistry, Vanderbilt University, Nashville, TN 37232, USA, <sup>3</sup>Department of Molecular & Cell Biology, University of California, Berkeley, CA 94720-3202, USA and <sup>4</sup>Faculty of Life Sciences, Department of Veterinary Disease Biology, University of Copenhagen, Stigbøjlen 4, DK-1870 Frederiksberg C, Denmark

\*Corresponding author: Department of Pathology, Microbiology and Immunology, Vanderbilt University School of Medicine 21<sup>st</sup> Avenue South, Medical Center North, Room A5102, Nashville, TN 37232, USA. Tel: +615-343-0002; Fax: +615-343-7392; E-mail: [eric.skaar@vanderbilt.edu](mailto:eric.skaar@vanderbilt.edu)

One sentence summary: Proteomic analyses reveal Clp protease targets under varying nutrient iron conditions in the human pathogen *Staphylococcus aureus*.

Editor: Raphael Valdivia

## ABSTRACT

*Staphylococcus aureus* is a frequent human pathogen that is capable of causing a wide range of life-threatening infections. A promising antibacterial target is the Clp proteolytic system, which performs the vital function of maintaining protein turnover within the cell. This system primarily impacts the bacterial response to various stresses by degrading specific proteins but can also regulate a number of physiological processes through protein degradation. A critical stress to which *S. aureus* must adapt during infection of a vertebrate host is nutrient iron limitation. We have previously shown that the Clp system impacts expression of genes required for heme-iron acquisition during iron limitation and is required for staphylococcal infection. Based on these data, we sought to further define the Clp-dependent impact on *S. aureus* during iron limitation by characterizing the proteomic profiles of mutants inactivated for components of the Clp protease, including ClpP, ClpC and ClpX, in high- and low-iron conditions. Our results reveal numerous proteins altered in abundance in the *clp* mutants and provide new insights into the staphylococcal proteolytic network during nutrient iron limitation.

**Key words:** protein; degradation; 2D-DIGE

*Staphylococcus aureus* is an important human pathogen and significant public health concern due to widespread antibiotic resistance and frequent community- and hospital-associated infections. Characterization of factors that allow *S. aureus* to evade clearance in the host will aid in designing new anti-staphylococcal therapeutics. During infection, *S. aureus* experiences a number of stresses ranging from immune system attack to nutrient limitation. The major protease in *S. aureus* is the Clp protease, which relieves stress by degrading accumulated

and misfolded proteins (Katayama-Fujimura, Gottesman and Maurizi 1987; Wickner, Maurizi and Gottesman 1999). The Clp protease also regulates numerous physiological processes, including metabolism, virulence and antibiotic resistance (Hecker, Schumann and Völker 1996; Conlon *et al.*, 2013). This proteolytic system is critical to staphylococcal pathogenesis as inactivation of *clp* genes significantly impairs virulence (Mei *et al.*, 1997; Frees *et al.*, 2003; Farrand *et al.*, 2013). The Clp protease has been successfully targeted by acyldepsipeptides, which activate ClpP and

Received: 14 November 2014; Accepted: 12 January 2015

© FEMS 2015. All rights reserved. For permissions, please e-mail: [journals.permissions@oup.com](mailto:journals.permissions@oup.com)

cause uncontrolled proteolysis resulting in bacterial cell death (Brotz-Oesterhelt et al., 2005). Acyldepsipeptides eliminate *S. aureus* biofilms and cure persistent infections in animals, further supporting the intriguing possibility of Clp proteolytic dysregulation as a viable treatment strategy (Brotz-Oesterhelt et al., 2005; Conlon et al., 2013). Furthermore, targeting the Clp protease represents a potential therapeutic for several important Gram-positive pathogens, including *Streptococcus pneumoniae*, *S. pyogenes* and *Enterococcus faecalis* (Brotz-Oesterhelt et al., 2005).

Nutrient limitation is a critical challenge that *S. aureus* must overcome during infection. This is particularly true in the case of iron, an important bacterial nutrient that is sequestered by host proteins to protect against infection. One strategy employed by some Gram-positive bacteria to circumvent iron sequestration is the iron-regulated surface determinant (Isd) system, which extracts and imports iron-containing heme from host hemoglobin (Mazmanian et al., 2003; Pishchany, Dickey and Skaar 2009). We recently demonstrated that the staphylococcal Clp genes impact heme acquisition by altering expression of Isd genes, resulting in impaired heme import, reduced growth in low iron and decreased pathogenesis in a systemic infection model (Farrand et al., 2013). We hypothesize that alteration of *isd* expression occurs through Clp-dependent proteolytic regulation of an as-yet-undefined transcriptional regulator. To better understand the role of the Clp protease during iron limitation, we performed 2D difference in gel (2D-DIGE) analysis on cytoplasmic fractions isolated from *S. aureus* mutants inactivated for the Clp protease, ClpP or the Hsp100/Clp ATPases ClpC and ClpX, which interact with ClpP and initiate proteolysis (Wawrzynow 1995; Kim et al., 2000; Singh et al., 2000).

Clp mutants were generated in the *S. aureus* Newman background (Frees et al., 2011; Farrand et al., 2013). Three biological replicates of wild type,  $\Delta clpP$ ,  $\Delta clpC$  or  $\Delta clpX$ , were grown to stationary phase in tryptic soy broth with or without the iron chelator 2,2-dipyridyl overnight (DIP; 1 mM final concentration). Bacteria were harvested, lysostaphin treated to digest cell wall and lysed in the presence of phenylmethylsulfonyl fluoride using an Emulsiflex-C3 high pressure homogenizer (Avestin). Cellular debris was removed with ultracentrifugation (100 000  $\times$  g) and cytoplasmic fractions were isolated.

2D-DIGE using the mixed-sample internal standard method was performed essentially as described previously (Friedman et al., 2006) using GE Healthcare Ettan DIGE instrumentation and software (Piscataway, New Jersey) per manufacturer's protocols. Twenty four individual samples, each containing 1 mg total protein, were coresolved using a 12-gel matrix where each gel contained a mixture of a pre-labeled Cy3/Cy5 pair of any two samples (167  $\mu$ g protein each) plus a 167  $\mu$ g aliquot of the Cy2-labeled pooled internal standard, for a total of 500  $\mu$ g per gel. Proteins were resolved using 24 cm pH 4–7 IPG strips followed by 20 cm 12.5% polyacrylamide gel electrophoresis. Cy2/3/5-specific 16-bit data files were acquired at 100  $\mu$ m resolution separately by dye-specific excitation and emission wavelengths using a Typhoon 9400 Variable Mode Imager and analyzed for significant protein abundance changes (Student's t-test and ANOVA) using the DeCyder v6.5 suite of software tools. The gels were stained for total protein content with SyproRuby (Molecular Probes/Invitrogen) for robotic spot picking and digestion with porcine trypsin protease (Trypsin Gold; Promega, Madison, WI, USA) using a GE Healthcare Spot Handling Workstation.

Peptide hydrolysates were analyzed by a 45 min data-dependent LC-MS/MS analysis. Peptides were resolved using an Eksigent 1D+ ultraHPLC equipped with an AS1 autosampler on

an 18 cm Jupiter (3  $\mu$ m, 300A) 100  $\mu$ m internal diameter, self-packed analytical column coupled directly to an LTQ-orbitrap (Thermo Fisher) via a nano-electrospray source. A full scan mass spectrum followed by five data-dependent tandem mass spectra (MS/MS) was collected throughout the run using dynamic exclusion to minimize acquisition of redundant spectra. MS/MS spectra were searched against the *S. aureus* Newman protein database and human protein database (UniprotKB v155) using SEQUEST ([www.ncbi.nlm.nih.gov/pubmed/7741214](http://www.ncbi.nlm.nih.gov/pubmed/7741214)) and results filtered and collated using Scaffold ([www.proteomesoftware.com](http://www.proteomesoftware.com)). MS data are available at <https://medschool.vanderbilt.edu/skaar-lab/our-projects>.

Proteomic analyses of *S. aureus* Clp mutants revealed many proteins that changed in abundance in varied iron levels (Table 1). These proteins impact numerous cellular processes, including metabolism, stress response, transcriptional regulation, protein synthesis and electron transport (Fig. 1). Interestingly, many proteins altered in  $\Delta clpP$  were similarly changed in  $\Delta clpX$ , suggesting that the ClpXP protease targets these proteins.

We identified proteins that have previously been shown to change in an iron-dependent manner (Friedman et al., 2006; Hempel et al., 2011). Some proteins (PflB, RocD2, decarboxylase NWMN\_0839, fumarylacetoacetate hydrolase-like protein NWMN\_0839) likely change upon iron starvation and are not impacted by the Clps, as levels changed equivalently in low iron regardless of *clp* expression. Other proteins known to be affected by iron starvation changed in the absence of *clp* expression, including metabolic proteins FruB and Tkt, which were upregulated in low iron in wild-type *S. aureus* (Friedman et al., 2006) but were reduced in  $\Delta clpX$  or  $\Delta clpP$ . Conversely, the ATP-binding Mrp/Nbp35 family protein (NWMN\_2067) and peptidase M20/M25/M40 (NWMN\_1418) were decreased in low iron in wild type (Friedman et al., 2006) but were more abundant in  $\Delta clpP$  regardless of iron status. A hydrolase (NWMN\_0521) was increased upon iron starvation in wild type (Hempel et al., 2011) but was downregulated in  $\Delta clpP$  in both conditions. The aldehyde dehydrogenase AldA was decreased in low iron in wild type (Hempel et al., 2011) but increased in  $\Delta clpX$ . These results suggest the Clp protease or ATPases could be important for degrading or stabilizing these proteins under iron restriction.

These results are further supported by Clp-trap experiments in which mutant forms of ClpP or ClpC that bind but do not degrade proteins were used to identify Clp targets (Feng et al., 2012; Graham, Lei and Lee 2013). Proteins altered in the *clpP* mutant and pulled down by ClpP<sup>trap</sup> included CodY, HslO, GuaB and SufD (Feng et al., 2012). CodY and HslO, a transcriptional regulator and a heat shock protein, respectively, were more abundant in  $\Delta clpP$  in iron-rich conditions, consistent with these proteins being Clp targets. Interestingly, GuaB and SufD, proteins involved in purine metabolism or iron-sulfur cluster assembly, were reduced in  $\Delta clpP$  in low iron, perhaps suggesting that ClpP is required to maintain protein levels during iron limitation. Several proteins bound by ClpC<sup>trap</sup> were impacted by the loss of *clpC*, such as CodY, ClpB, ClpP, NWMN\_0976 and an ATP-binding Mrp/Nbp35 family protein (Graham, Lei and Lee 2013), all of which were enhanced in this mutant.

These data revealed many proteins involved in iron homeostasis and transport that were impacted by the Clps in iron-rich conditions. The iron storage molecule ferritin (NWMN\_1831), which is normally downregulated in low iron (Stenz et al., 2011), was decreased in all three mutants in iron-replete conditions. This is consistent with lower reported cell-associated iron levels in  $\Delta clpC$  compared to wild type during exponential

**Table 1.** Compilation of proteins identified in 2D-DIGE analyses of *S. aureus* *clp* mutants compared to wild-type cells in iron-replete and -deplete (+ DIP) conditions. # = spot number. Protein = protein name or *S. aureus* Newman gene identifier. Acc number = NCBI accession number. % Cov = percent sequence coverage. # Pep = number of peptides identified. Fold = fold change relative to wild-type cells. P = *p* value according to Student's *t*-test. \* = No reliable signal. *Staphylococcus aureus* proteins not included in this list were not changed in *clp* mutants relative to wild-type cells in iron-replete or -deplete conditions. Empty boxes reflect no observed change in the abundance of the protein compared to wild type in the specified condition.

| #  | Protein | Acc number | MWpl     | % Cov | # Pep | $\Delta clpP$ |        | $\Delta clpP \pm DIP$ |       | $\Delta clpC$ |          | $\Delta clpC \pm DIP$ |          | $\Delta clpX$ |          | $\Delta clpX \pm DIP$ |          |
|----|---------|------------|----------|-------|-------|---------------|--------|-----------------------|-------|---------------|----------|-----------------------|----------|---------------|----------|-----------------------|----------|
|    |         |            |          |       |       | Fold          | P      | Fold                  | P     | Fold          | <i>p</i> | Fold                  | <i>p</i> | Fold          | <i>p</i> | Fold                  | <i>p</i> |
| 1  | ClpB    | 150373857  | 98 4.96  | 35    | 32    |               |        | 2.91                  | 0.006 |               |          | 3.82                  | 0.004    |               |          | -2.31                 | 0.041    |
| 2  | ClpB    | 150373857  | 98 4.96  | 45    | 45    |               |        | 3.83                  | 0.014 |               |          | 6.46                  | 0.003    |               |          |                       |          |
| 2  | ValS    | 150374570  | 102 4.99 | 17    | 18    |               |        | 3.83                  | 0.014 |               |          | 6.46                  | 0.003    |               |          |                       |          |
| 3  | SecA    | 150373734  | 96 5.11  | 33    | 33    |               |        | 4.33                  | 0.018 |               |          |                       |          |               |          |                       |          |
| 4  | FusA    | 151220721  | 77 4.81  | 28    | 23    | 6.31          | 0.012  | 1.68                  | 0.059 | 6.48          | 0.046    |                       |          | 6.23          | 0.006    |                       |          |
| 4  | ClpC    | 150373499  | 91 5.51  | 13    | 9     | 6.31          | 0.012  | 1.68                  | 0.059 | 6.48          | 0.046    |                       |          | 6.23          | 0.006    |                       |          |
| 4  | PurL    | 150373949  | 80 4.77  | 13    | 9     | 6.31          | 0.012  | 1.68                  | 0.059 | 6.48          | 0.046    |                       |          | 6.23          | 0.006    |                       |          |
| 5  | ClpC    | 151220699  | 91 5.51  | 35    | 34    | 15.2          | 0.068  | 12.31                 | .0004 |               |          | -3.95                 | 0.02     |               |          | -6.54                 | 0.018    |
| 6  | ClpC    | 151220699  | 91 5.51  | 32    | 29    | 5.93          | 0.0002 | 11.21                 | 0.001 |               |          |                       |          | -2.94         | 0.001    |                       |          |
| 7  | ClpB    | 150373857  | 98 4.96  | 46    | 56    | 26.65         | 0.01   | 25.97                 | 0.004 | 8.58          | 0.06     | 30.55                 | 0.004    |               |          |                       |          |
| 7  | TypA    | 150373986  | 69 4.93  | 18    | 12    | 26.65         | 0.01   | 25.97                 | 0.004 | 8.58          | 0.06     | 30.55                 | 0.004    |               |          |                       |          |
| 8  | PflB    | 150373174  | 85 5.31  | 31    | 28    |               |        |                       |       |               |          |                       |          |               |          | -16.6                 | 0.054    |
| 9* |         |            |          |       |       |               |        |                       |       |               |          |                       |          |               |          |                       |          |
| 10 | ClpL    | 150375460  | 78 4.88  | 46    | 49    | 2.09          | 0.043  |                       |       | 3.09          | 0.004    |                       |          | 1.63          | 0.007    | -3.95                 | 0.046    |
| 10 | PykA    | 150374604  | 63 5.23  | 28    | 15    | 2.09          | 0.043  |                       |       | 3.09          | 0.004    |                       |          | 1.63          | 0.007    | -3.95                 | 0.046    |
| 11 | Tkt     | 150374266  | 72 5.00  | 61    | 38    | -1.9          | 0.003  | -1.53                 | 0.03  |               |          |                       |          | -1.33         | 0.035    |                       |          |
| 12 | GuaA    | 150373393  | 58 5.02  | 26    | 18    |               |        | -2.08                 | 0.005 |               |          |                       |          |               |          | -2.06                 | 0.042    |
| 12 | SufB    | 15373801   | 53 5.08  | 30    | 14    |               |        | -2.08                 | 0.005 |               |          |                       |          |               |          | -2.06                 | 0.042    |
| 12 | Tkt     | 150374266  | 72 5.00  | 26    | 14    |               |        | -2.08                 | 0.005 |               |          |                       |          |               |          | -2.06                 | 0.042    |
| 12 | .0050   | 150373062  | 68 5.00  | 18    | 14    |               |        | -2.08                 | 0.005 |               |          |                       |          |               |          | -2.06                 | 0.042    |
| 12 | Zwf     | 150374424  | 57 5.31  | 17    | 10    |               |        | -2.08                 | 0.005 |               |          |                       |          |               |          | -2.06                 | 0.042    |
| 13 | SufD    | 150373798  | 49 5.28  | 22    | 12    |               |        | -1.63                 | 0.007 |               |          |                       |          |               |          | -1.72                 | 0.01     |
| 13 | GltX    | 150373502  | 56 5.21  | 35    | 22    |               |        | -1.63                 | 0.007 |               |          |                       |          |               |          | -1.72                 | 0.01     |
| 14 | SufD    | 150373502  | 49 5.28  | 32    | 16    |               |        | -1.72                 | 0.026 |               |          |                       |          |               |          | -2.02                 | 0.048    |
| 14 | GltX    | 150373798  | 56 5.21  | 43    | 29    |               |        | -1.72                 | 0.026 |               |          |                       |          |               |          | -2.02                 | 0.048    |
| 15 | .2026   | 150375038  | 52 5.04  | 45    | 33    |               |        |                       |       |               |          |                       |          | 2.08          | 0.004    | 2.77                  | 0.069    |
| 15 | AldA    | 150373125  | 54 5.12  | 40    | 21    |               |        |                       |       |               |          |                       |          | 2.08          | 0.004    | 2.77                  | 0.069    |
| 15 | GatB    | 150374849  | 54 5.04  | 41    | 22    |               |        |                       |       |               |          |                       |          | 2.08          | 0.004    | 2.77                  | 0.069    |
| 16 | GuaB    | 150373392  | 53 5.61  | 55    | 35    |               |        | -2.53                 | 0.008 |               |          |                       |          |               |          | -3.1                  | 0.028    |
| 16 | Mqo2    | 150375516  | 56 6.12  | 19    | 9     |               |        | -2.53                 | 0.008 |               |          |                       |          |               |          | -3.1                  | 0.028    |
| 16 | .2506   | 150375518  | 61 5.56  | 14%   | 9     |               |        | -2.53                 | 0.008 |               |          |                       |          |               |          | -3.1                  | 0.028    |
| 17 | AtpA    | 150375021  | 55 4.86  | 42    | 25    | -3.62         | 0.001  |                       |       |               |          | -1.51                 | 0.017    | -2.6          | 0.004    |                       |          |
| 18 | AtpD    | 150375019  | 51 4.68  | 47    | 23    | -3.77         | 0.005  | -1.88                 | 0.011 |               |          |                       |          | -3.17         | 0.032    |                       |          |
| 18 | TufA    | 150373522  | 43 4.74  | 36    | 13    | -3.77         | 0.005  | -1.88                 | 0.011 |               |          |                       |          | -3.17         | 0.032    |                       |          |
| 19 | Pgi     | 150373845  | 50 4.83  | 42    | 30    | -1.71         | 0.005  | -1.32                 | 0.076 |               |          |                       |          |               |          |                       |          |
| 19 | TufA    | 150373522  | 43 4.74  | 47    | 16    | -1.71         | 0.005  | -1.32                 | 0.076 |               |          |                       |          |               |          |                       |          |
| 20 | GlyA    | 150375029  | 45 5.75  | 45    | 27    | 1.63          | 0.004  |                       |       |               |          |                       |          | 1.94          | 0.026    | 1.76                  | 0.093    |
| 21 | .1317   | 150374329  | 44 5.76  | 54    | 26    | 3.18          | 0.009  |                       |       | 3.52          | 0.04     |                       |          | 5.47          | 0.003    |                       |          |
| 22 | .0175   | 150373187  | 43 5.29  | 35    | 16    | 3.07          | 0.023  | 5.28                  | 0.035 | 2.92          | 0.047    |                       |          | 2.84          | 0.052    |                       |          |
| 22 | .0512   | 150373524  | 43 5.20  | 22    | 10    | 3.07          | 0.023  | 5.28                  | 0.035 | 2.92          | 0.047    |                       |          | 2.84          | 0.052    |                       |          |
| 22 | AckA    | 150374617  | 44 5.65  | 23    | 8     | 3.07          | 0.023  | 5.28                  | 0.035 | 2.92          | 0.047    |                       |          | 2.84          | 0.052    |                       |          |
| 23 | CitC    | 150374599  | 46 4.84  | 32    | 18    | 2.2           | 0.022  | 5.23                  | 6E-05 |               |          |                       |          | 3.08          | 0.028    | 5.08                  | 0.03     |
| 23 | .2072   | 150375084  | 45 4.86  | 27    | 9     | 2.2           | 0.022  | 5.23                  | 6E-05 |               |          |                       |          | 3.08          | 0.028    | 5.08                  | 0.03     |
| 23 | PepS    | 150374829  | 47 4.84  | 16    | 8     | 2.2           | 0.022  | 5.23                  | 6E-05 |               |          |                       |          | 3.08          | 0.028    | 5.08                  | 0.03     |
| 24 | .1418   | 150374430  | 40 5.04  | 31    | 16    | 1.47          | 0.003  | 1.89                  | 0.048 |               |          |                       |          |               |          |                       |          |
| 25 | .0826   | 150373838  | 42 5.24  | 26%   | 14    | 3.4           | 0.007  |                       |       | 2.08          | 0.02     |                       |          | 3.72          | 0.003    | -1.57                 | 0.039    |
| 25 | RocD2   | 150373839  | 43 5.21  | 23    | 12    | 3.4           | 0.007  |                       |       | 2.08          | 0.02     |                       |          | 3.72          | 0.003    | -1.57                 | 0.039    |
| 26 | .1434   | 150374446  | 39 5.23  | 32    | 15    |               |        | 4.1                   | 0.005 | 1.96          | .0001    |                       |          | 1.6           | 0.008    | 2.4                   | 0.03     |
| 26 | .2067   | 150375079  | 38 5.29  | 31    | 13    |               |        | 4.1                   | 0.005 | 1.96          | .0001    |                       |          | 1.6           | 0.008    | 2.4                   | 0.03     |
| 27 | Pta     | 150373563  | 35 4.72  | 34    | 19    | -2.2          | 0.003  | -1.63                 | 0.026 |               |          |                       |          |               |          |                       |          |
| 27 | PpaC    | 150374869  | 34 4.69  | 30    | 11    | -2.2          | 0.003  | -1.63                 | 0.026 |               |          |                       |          |               |          |                       |          |
| 28 | PhdB    | 150373972  | 35 4.65  | 47    | 17    |               |        | -1.57                 | 0.028 |               |          |                       |          |               |          | -1.44                 | 0.04     |
| 28 | PpaC    | 150374869  | 34 4.69  | 28    | 9     |               |        | -1.57                 | 0.028 |               |          |                       |          |               |          | -1.44                 | 0.04     |
| 29 | Tsf     | 150374179  | 32 5.09  | 85    | 39    |               |        |                       |       |               |          |                       |          |               |          |                       |          |
| 29 | Ldh1    | 151220388  | 35 4.95  | 42    | 16    |               |        |                       |       |               |          |                       |          |               |          |                       |          |
| 30 | CcpA    | 150374641  | 36 5.58  | 32    | 16    | 5.4           | 0.004  | 2.11                  | 0.031 |               |          |                       |          | 2.91          | 0.025    |                       |          |
| 31 | SucD    | 150374168  | 32 5.47  | 54    | 23    | 2.18          | 0.058  |                       |       |               |          |                       |          | 2.83          | 0.019    |                       |          |
| 32 | .2422   | 150375434  | 35 5.06  | 48    | 20    | 8.13          | 0.001  | 11.71                 | 0.007 | 3.41          | 0.077    |                       |          | 4.97          | 0.004    |                       |          |
| 33 | Fda     | 150375515  | 33 4.92  | 72    | 31    | 2.35          | .0001  | -1.69                 | 0.002 | 1.97          | 0.052    |                       |          | 1.93          | 0.011    |                       |          |
| 34 | Fda     | 150375515  | 33 4.92  | 89    | 43    | 5.16          | 0.005  |                       |       | 3.31          | 0.092    |                       |          | 4.33          | 0.009    |                       |          |
| 35 | .2480   | 150375492  | 31 4.67  | 50    | 19    |               |        | -3.09                 | 0.003 |               |          | -1.71                 | 0.004    |               |          | -1.98                 | 0.015    |
| 36 | Nfo     | 150374472  | 33 5.63  | 40    | 23    | -1.37         | 0.072  | -1.64                 | 0.004 |               |          |                       |          |               |          |                       |          |
| 37 | RpsB    | 151221378  | 29 5.42  | 41    | 11    | -2.49         | 0.005  |                       |       |               |          |                       |          |               |          | -1.72                 | 0.05     |
| 37 | FruB    | 150373680  | 33 4.64  | 17    | 9     | -2.49         | 0.005  |                       |       |               |          |                       |          |               |          | -1.72                 | 0.05     |

Table 1 continued.

| #   | Protein   | Acc number | MWpI    | % Cov | # Pep | $\Delta clpP$ |       | $\Delta clpP \pm DIP$ |        | $\Delta clpC$ |       | $\Delta clpC \pm DIP$ |       | $\Delta clpX$ |       | $\Delta clpX \pm DIP$ |             |
|-----|-----------|------------|---------|-------|-------|---------------|-------|-----------------------|--------|---------------|-------|-----------------------|-------|---------------|-------|-----------------------|-------------|
|     |           |            |         |       |       | Fold          | P     | Fold                  | P      | Fold          | p     | Fold                  | p     | Fold          | p     | Fold                  | p           |
| 38  | MemB      | 150373927  | 30 5.41 | 42    | 16    |               |       | -1.73                 | 0.008  |               |       |                       |       |               |       |                       |             |
| 39  | HchA      | 150373525  | 32 4.90 | 35    | 14    | -3.06         | 0.011 | -2.31                 | 0.012  |               |       |                       |       |               |       |                       | -1.86 0.094 |
| 39  | _0521     | 150373533  | 32 4.91 | 45    | 12    | -3.06         | 0.011 | -2.31                 | 0.012  |               |       |                       |       |               |       |                       |             |
| 40  | Tuf       | 150373522  | 43 4.74 | 31    | 11    |               |       | 4.48                  | 0.006  |               |       |                       |       |               |       |                       |             |
| 40  | HchA      | 150373525  | 32 4.90 | 23    | 8     |               |       | 4.48                  | 0.006  |               |       |                       |       |               |       |                       |             |
| 41  | _0839     | 150373851  | 33 4.84 | 61    | 21    | 2.03          | 0.07  | 2.05                  | 0.019  | 1.98          | 0.09  | 1.78                  | 0.06  | 4.03          | 0.001 |                       |             |
| 42  | GrpE      | 150374496  | 24 4.42 | 58    | 17    |               |       | 2.69                  | 0.005  |               |       |                       |       | -1.34         | 0.089 |                       |             |
| 43  | _0881     | 150373893  | 28 5.64 | 44    | 17    | 2.76          | 0.032 | 4.29                  | 0.008  |               |       |                       |       |               |       |                       |             |
| 44  | HslO      | 150373486  | 32 4.96 | 44    | 15    | 1.49          | 0.03  |                       |        |               |       |                       |       | 2.05          | 0.007 |                       |             |
| 45  | _0035     | 150373047  | 33 5.71 | 15    | 5     | 4.35          | 0.007 |                       |        |               |       |                       |       | 2.4           | 0.026 |                       |             |
| 46  | NagB      | 150373544  | 28 5.43 | 37    | 14    | 2.93          | 0.003 | 2.59                  | 0.027  | 1.99          | 0.046 |                       |       | 2.89          | 0.001 |                       |             |
| 47  | _2596     | 150375608  | 30 5.99 | 34    | 11    |               |       |                       |        |               |       |                       |       | 1.77          | 0.010 |                       |             |
| 48  | _2596     | 150375608  | 30 5.99 | 30    | 8     |               |       |                       |        | -1.24         | 0.067 |                       |       | 1.48          | .0002 |                       |             |
| 49  | GpmA      | 150375327  | 27 5.23 | 40    | 15    | -5.39         | 0.004 | -1.79                 | 0.009  | -2.75         | 0.049 |                       |       | -2.65         | 0.044 |                       |             |
| 49  | _1921     | 150374933  | 27 5.24 | 36    | 9     | -5.39         | 0.004 | -1.79                 | 0.0087 | -2.75         | 0.049 |                       |       | -2.65         | 0.044 |                       |             |
| 50  | Pfs/ MtnN | 150374513  | 25 4.83 | 30    | 9     | -1.3          | 0.034 | -2.71                 | 0.008  |               |       |                       |       | 1.28          | 0.006 |                       |             |
| 51  | PanB      | 150375508  | 29 5.61 | 45    | 16    | -1.92         | 0.027 |                       |        |               |       |                       |       | -1.83         | 0.013 |                       |             |
| 52  | CodY      | 150374177  | 29 5.87 | 33    | 14    | 5.16          | 0.004 | 1.77                  | 0.087  | 2.84          | 0.014 |                       |       | 4.35          | 0.004 |                       |             |
| 53  | _1102     | 150374114  | 24 4.91 | 38    | 14    |               |       |                       |        |               |       |                       |       |               |       |                       |             |
| 53  | _0071     | 150373083  | 27 5.04 | 25    | 8     |               |       |                       |        |               |       |                       |       |               |       |                       |             |
| 54  | IspD1     | 150373197  | 27 5.69 | 48    | 13    | -1.67         | 0.005 |                       |        |               |       |                       |       | -1.68         | 0.005 |                       |             |
| 55  | Adk       | 150375143  | 24 4.80 | 61    | 22    | -1.78         | 0.001 |                       |        |               |       |                       |       |               |       |                       |             |
| 56  | DeoC      | 150375053  | 23 4.71 | 40    | 12    |               |       | 1.39                  | 0.025  |               |       |                       |       | 1.91          | 0.007 | 2.13                  | 0.099       |
| 56  | _1672     | 150374684  | 26 4.72 | 44    | 11    |               |       | 1.39                  | 0.025  |               |       |                       |       | 1.91          | 0.007 | 2.13                  | 0.099       |
| 56  | Adk       | 150375143  | 24 4.80 | 47%   | 16    |               |       | 1.39                  | 0.025  |               |       |                       |       | 1.91          | 0.007 | 2.13                  | 0.099       |
| 57  | _2421     | 150375433  | 25 5.52 | 35    | 12    | 3.83          | 0.013 | 1.59                  | 0.09   | 3.25          | 0.052 |                       |       | 3.42          | 0.002 |                       |             |
| 58  | Ppi       | 150373836  | 22 4.53 | 17    | 3     |               |       | -1.93                 | 0.063  |               |       |                       |       |               |       | 2.11                  | 0.048       |
| 59  | Ppi       | 150373836  | 22 4.53 | 29    | 9     |               |       | -1.5                  | 0.003  |               |       |                       |       | 1.7           | 0.077 |                       |             |
| 59  | _0533     | 150373545  | 22 4.57 | 23    | 5     |               |       | -1.5                  | 0.003  |               |       |                       |       | 1.7           | 0.077 |                       |             |
| 60  | _1941     | 150374953  | 24 5.27 | 39    | 14    | -3.93         | 0.001 | -2.2                  | 0.055  |               |       |                       |       | -2.18         | 0.01  | -3.89                 | 0.001       |
| 61  | VraR      | 151222034  | 24 5.46 | 47    | 10    | 3.36          | 0.013 | 1.64                  | 0.016  |               |       |                       |       | 3.55          | 0.009 |                       |             |
| 62  | FabG      | 150374153  | 26 5.33 | 34    | 13    | 5.51          | 0.003 | 2.57                  | 0.015  | 4.26          | 0.042 | 1.8                   | 0.085 | 6.77          | 0.005 |                       |             |
| 63  | Frr       | 150374181  | 20 5.04 | 55    | 22    | -1.8          | .0006 |                       |        |               |       |                       |       |               |       |                       |             |
| 64  | ClpP      | 150373748  | 22 5.13 | 28    | 7     | -6.54         | 0.002 | -10.18                | .0004  |               |       | 4.46                  | .0005 |               |       |                       |             |
| 65  | MsrA      | 150374347  | 21 6.15 | 22    | 7     | 3.73          | 8E-05 | 2.36                  | 0.001  | 2.5           | 0.025 | 2.46                  | 0.011 | 5.41          | 0.002 |                       |             |
| 66  | _1767     | 150374779  | 19 4.59 | 18    | 5     |               |       | -2.44                 | 0.001  |               |       | -1.37                 | 0.02  |               |       |                       |             |
| 67  | _1856     | 150374868  | 215.66  | 33    | 6     |               |       |                       |        | 3.59          | 0.021 | 2.77                  | 0.001 |               |       |                       |             |
| 68  | _0115     | 150373127  | 19 4.68 | 38    | 14    | -3.44         | .0004 | -2.52                 | 0.003  |               |       | -2.22                 | 0.015 | -1.88         | 0.001 |                       |             |
| 69  | _0885     | 150373897  | 19 5.04 | 29    | 5     |               |       |                       |        |               |       |                       |       |               |       |                       |             |
| 70  | AtpH      | 150375022  | 20 6.15 | 47    | 11    | 3.76          | .0004 |                       |        | 2.48          | 0.081 |                       |       | 2.56          | 0.003 | -2.11                 | 0.079       |
| 71* |           |            |         |       |       |               |       |                       |        |               |       |                       |       |               |       |                       |             |
| 72  | _1213     | 150374225  | 18 6.31 | 54    | 13    | 3.19          | 0.006 |                       |        | 2.18          | 0.004 |                       |       | 2.97          | 0.05  |                       |             |
| 73  | _1604     | 150374616  | 18 5.60 | 33    | 8     |               |       |                       |        | 4.48          | 0.002 | 1.68                  | 0.078 | 3.15          | 0.016 |                       |             |
| 74  | _2086     | 150375098  | 19 5.13 | 38    | 9     | -5.14         | 0.003 | -2.93                 | 0.031  | -2.82         | 0.042 | -2.3                  | 0.059 | -3.34         | 0.002 |                       |             |
| 74  | Apt       | 150374549  | 19 4.74 | 20    | 5     | -5.14         | 0.003 | -2.93                 | 0.031  | -2.82         | 0.042 | -2.3                  | 0.059 | -3.34         | 0.002 |                       |             |
| 75  | GreA      | 150374523  | 18 4.53 | 51    | 12    | 2.51          | 0.011 |                       |        |               |       |                       |       | 3.15          | 0.017 |                       |             |
| 76  | _1831     | 150374843  | 20 4.64 | 42    | 10    | -16.0         | .0002 |                       |        | -5.52         | 0.001 |                       |       | -1.69         | 0.077 | -1.76                 | 0.082       |
| 77  | Tpx       | 150374619  | 18 4.56 | 18    | 4     |               |       |                       |        |               |       |                       |       |               |       |                       |             |
| 78  | _1755     | 150374767  | 17 5.48 | 63    | 19    | 7.92          | 0.002 | 1.96                  | 0.089  |               |       |                       |       | 5.57          | 0.004 |                       |             |
| 79  | _0976     | 150373988  | 19 5.16 | 30    | 5     | 3.76          | 0.003 |                       |        | 2             | 0.062 |                       |       | 4.24          | 0.002 |                       |             |
| 80  | _0533     | 150373545  | 22 4.57 | 37    | 10    | -2.65         | .0004 | -2.71                 | 0.003  | -1.74         | 0.061 |                       |       | -1.55         | 0.019 |                       |             |
| 81  | Adh1      | 150373589  | 36 5.34 | 55    | 30    | -7.09         | 0.010 | -3.9                  | 0.004  |               |       |                       |       | -4.51         | 0.012 | -6.03                 | .0008       |

and early stationary growth (Chatterjee et al., 2009). Two proteins involved in iron-sulfur cluster formation, SufB and SufD (NWMN\_0789 and NWMN\_0786), were decreased in  $\Delta clpP$  and  $\Delta clpX$  upon iron starvation. Flavohemoprotein (NWMN\_0175), a component of the nitrosative stress response that binds heme, iron and other metals, was increased in all *clp* mutants in iron-rich conditions. Alteration of proteins involved in iron homeostasis in *clp* mutants may reflect the importance of this protease to withstanding stresses including oxidative stress, which would be enhanced in high iron.

The indirect impact of Clp protease activity on protein abundance under varying iron conditions is likely far reaching due to the effect of the Clps on transcriptional regulators. CodY, a global virulence repressor (Stenz et al., 2011), was increased in all *clp* mutants. VraR controls expression of cell wall stress response and antimicrobial resistance genes (Kuroda et al., 2003;

Gardete et al., 2006), and was more abundant in  $\Delta clpP$  and  $\Delta clpX$ . CcpA, a regulator of carbon metabolism and virulence (Seidl et al., 2006), was also increased in  $\Delta clpP$  and  $\Delta clpX$ . These data suggest that Clp proteolytic regulation likely plays an important role in controlling levels of these regulators, thus indirectly influencing genes under their control.

Proteomic analyses of cytoplasmic fractions isolated from *S. aureus clp* mutants revealed many proteins altered in abundance by the Clps in an iron-dependent manner. Some proteins altered in the Clp mutants are confirmed in other studies (Friedman et al., 2006; Michel et al., 2006; Chatterjee et al., 2009). However, many proteins revealed in these analyses were not previously known to be impacted by the Clp protease. Thus, these results represent a broader view of the cellular processes influenced by this system and highlight the role of the Clps under nutrient limitation similar to that experienced

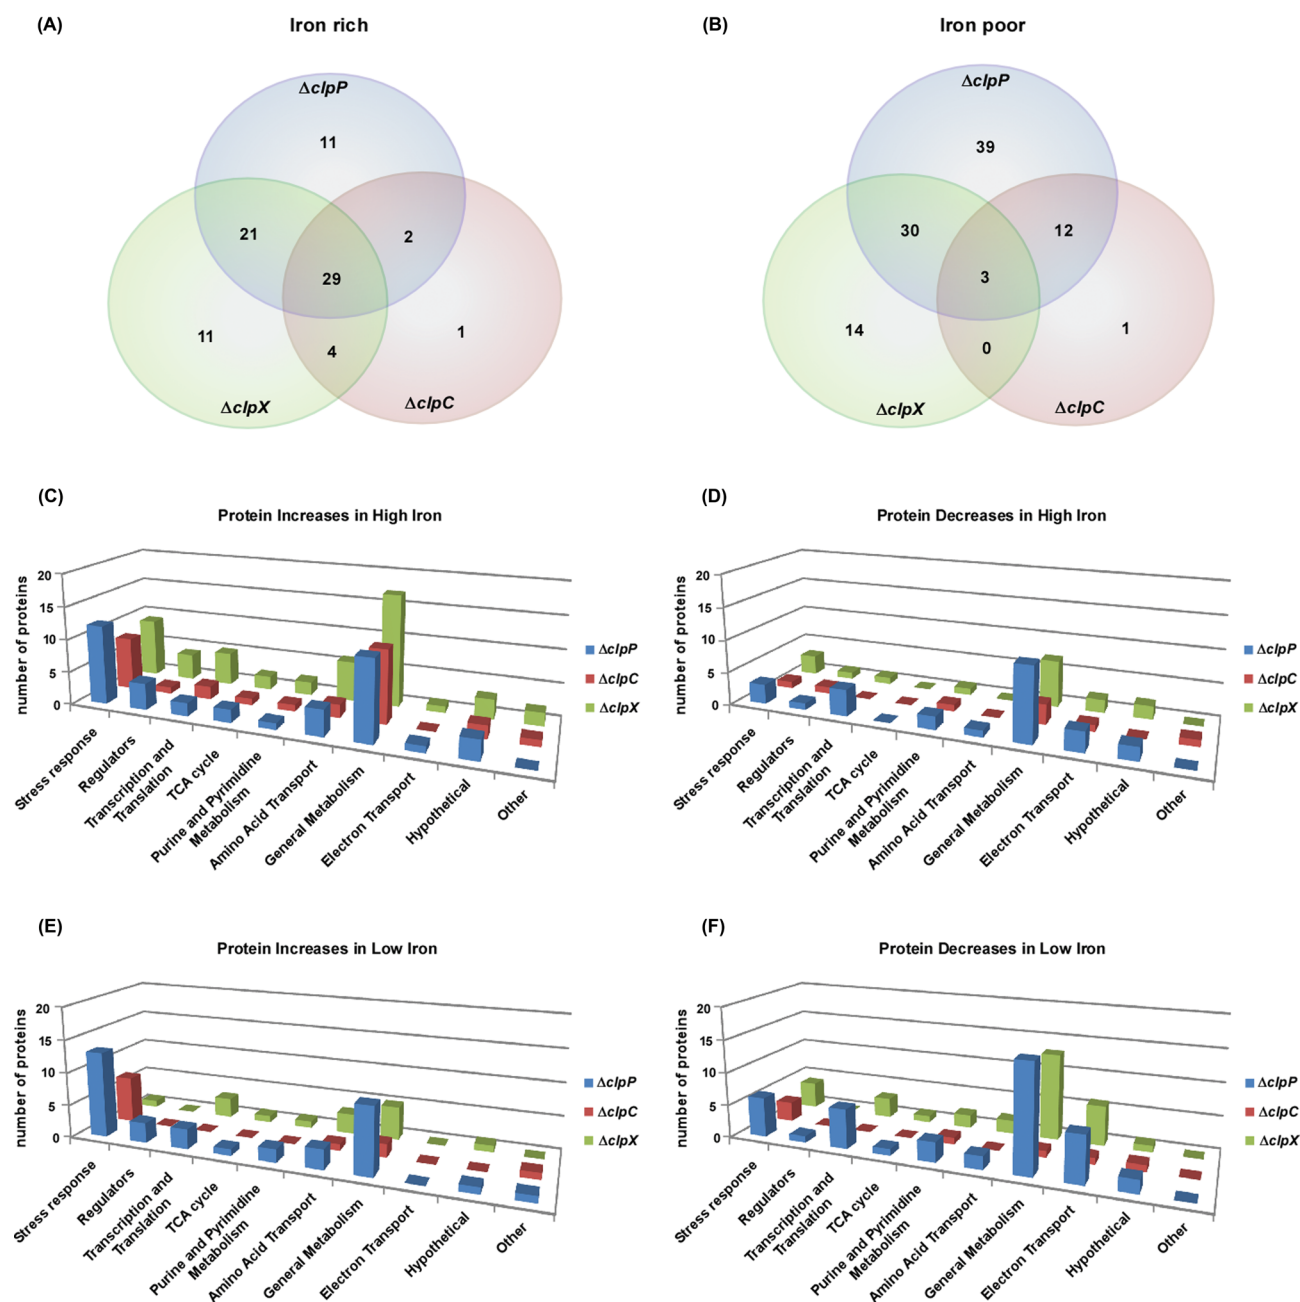

Figure 1: (A and B) Venn diagrams displaying the number of proteins altered in abundance in the *clp* knockout strains compared to wild-type *S. aureus* in iron-rich and iron-poor conditions. (C-F) Pathways impacted by proteins affected in *clp* knockout strains compared to wild-type *S. aureus* in iron-rich and iron-poor conditions.

during infection. Moreover, these data represent the first proteomic analyses of a *S. aureus*  $\Delta clpX$  in iron-replete and -deplete conditions. These studies reveal new insights into the *S. aureus* proteolytic network and underscore the importance of the Clp protease for withstanding stresses such as nutrient iron limitation.

## FUNDING

This research was supported by NIH grants AI069233 and AI073843 (EPS) and F32 AI098380 (AJF) and funded by the NIAID.

**Conflict of interest statement.** None declared.

## REFERENCES

- Brotz-Oesterhelt H, Beyer D, Kroll H-P, et al. Dysregulation of bacterial proteolytic machinery by a new class of antibiotics. *Nat Med* 2005;11:1082–7.
- Chatterjee I, Schmitt S, Batzilla CF, et al. *Staphylococcus aureus* ClpC ATPase is a late growth phase effector of metabolism and persistence. *Proteomics* 2009;9:1152–76.
- Conlon BP, Nakayasu ES, Fleck LE, et al. Activated ClpP kills persisters and eradicates a chronic biofilm infection. *Nature* 2013;503:365–70.
- Farrand AJ, Reniere ML, Ingmer H, et al. Regulation of host hemoglobin binding by the staphylococcus aureus Clp proteolytic system. *J Bacteriol* 2013;195:5041–50.

- Feng J, Michalik S, Varming AN, et al. Trapping and proteomic identification of cellular substrates of the ClpP protease in *Staphylococcus aureus*. *J Proteome Res* 2012;**12**:547–58.
- Frees D, Andersen JH, Hemmingsen L, et al. New insights into *Staphylococcus aureus* stress tolerance and virulence regulation from an analysis of the role of the ClpP protease in the strains Newman, COL, and SA564. *J Proteome Res* 2011;**11**:95–108.
- Frees D, Qazi SNA, Hill PJ, et al. Alternative roles of ClpX and ClpP in *Staphylococcus aureus* stress tolerance and virulence. *Mol Microbiol* 2003;**48**:1565–78.
- Friedman DB, Stauff DL, Pishchany G, et al. *Staphylococcus aureus* redirects central metabolism to increase iron availability. *PLoS Pathog* 2006;**2**:e87.
- Gardete S, Wu SW, Gill S, et al. Role of VraSR in antibiotic resistance and antibiotic-induced stress response in *Staphylococcus aureus*. *Antimicrob Agents Ch* 2006;**50**:3424–34.
- Graham JW, Lei MG, Lee CY. Trapping and identification of cellular substrates of the *Staphylococcus aureus* ClpC chaperone. *J Bacteriol* 2013;**195**:4506–16.
- Hecker M, Schumann W, Völker U. Heat-shock and general stress response in *Bacillus subtilis*. *Mol Microbiol* 1996;**19**:417–28.
- Hempel K, Herbst F-A, Moche M, et al. Quantitative proteomic view on secreted, cell surface-associated, and cytoplasmic proteins of the methicillin-resistant human pathogen *Staphylococcus aureus* under iron-limited conditions. *J Proteome Res* 2011;**10**:1657–66.
- Katayama-Fujimura Y, Gottesman S, Maurizi MR. A multiple-component, ATP-dependent protease from *Escherichia coli*. *J Biol Chem* 1987;**262**:4477–85.
- Kim Y-I, Burton RE, Burton BM, et al. Dynamics of substrate denaturation and translocation by the ClpXP degradation machine. *Mol Cell* 2000;**5**:639–48.
- Kuroda M, Kuroda H, Oshima T, et al. Two-component system VraSR positively modulates the regulation of cell-wall biosynthesis pathway in *Staphylococcus aureus*. *Mol Microbiol* 2003;**49**:807–21.
- Mazmanian SK, Skaar EP, Gaspar AH, et al. Passage of heme-iron across the envelope of *Staphylococcus aureus*. *Science* 2003;**299**:906–9.
- Mei J-M, Nourbakhsh F, Ford CW, et al. Identification of *Staphylococcus aureus* virulence genes in a murine model of bacteraemia using signature-tagged mutagenesis. *Mol Microbiol* 1997;**26**:399–407.
- Michel A, Agerer F, Hauck CR, et al. Global regulatory impact of ClpP protease of *Staphylococcus aureus* on regulons involved in virulence, oxidative stress response, autolysis, and DNA Repair. *J Bacteriol* 2006;**188**:5783–96.
- Pishchany G, Dickey SE, Skaar EP. Subcellular localization of the *Staphylococcus aureus* heme iron transport components IsdA and IsdB. *Infect Immun* 2009;**77**:2624–34.
- Seidl K, Stucki M, Ruegg M, et al. *Staphylococcus aureus* CcpA affects virulence determinant production and antibiotic resistance. *Antimicrob Agents Ch* 2006;**50**:1183–94.
- Singh SK, Grimaud R, Hoskins JR, et al. Unfolding and internalization of proteins by the ATP-dependent proteases ClpXP and ClpAP. *P Natl Acad Sci USA* 2000;**97**:8898–903.
- Stenz L, Francois P, Whiteson K, et al. The CodY pleiotropic repressor controls virulence in gram-positive pathogens. *FEMS Immunol Med Mic* 2011;**62**:123–39.
- Wawrzynow A D, Wojtkowiak J., Marszalek B, et al. The ClpX heat-shock protein of *Escherichia coli*, the ATP-dependent substrate specificity component of the ClpP-ClpX protease, is a novel molecular chaperone. *EMBO J* 1995;**14**:1867–77.
- Wickner S, Maurizi MR, Gottesman S. Posttranslational quality control: folding, refolding, and degrading proteins. *Science* 1999;**286**:1888–93.
